# Supplementary material for: A Novel Beagle Inspired Optimization Algorithm: Comprehensive Evaluation on Benchmarking Functions
Source: Research Square preprint supplement (doi:10.21203/rs.3.rs-6128887/v1), 2025-03-25
Supplement: Supplementary file 1 [file e5829fdc3309f02b30adfcd7.xlsx]

## Sheet: Sheet1
Function	Algorithm	Mean	Median	Std	Best	Worst
Sphere Function	PSO	2.29208e-05	7.65719e-06	3.92137e-05	6.40235e-08	0.000135618
Rosenbrock Function	PSO	0.00062761	0.000216775	0.000797881	1.02119e-05	0.00255112
Rastrigin Function	PSO	0.0318527	0.00572511	0.0702246	3.47748e-05	0.239169
Griewank Function	PSO	1.85251e-05	5.75309e-06	3.08781e-05	3.36293e-08	0.000103102
Ackley Function	BIOA	8.68984e-06	5.21877e-06	9.06952e-06	6.33222e-07	2.71159e-05
Levy Function	PSO	1.60328e-05	6.38967e-06	2.93304e-05	4.04747e-07	0.000102456
Schwefel Function	PSO	-4.15541e+121	-5.31806e+110	1.24662e+122	-4.15539e+122	-3.16161e+60
Sphere Function	CS	0.000717919	0.000625792	0.000578025	9.27872e-05	0.0018205
Rosenbrock Function	CS	0.013789	0.0109962	0.0110097	0.000602615	0.0344641
Rastrigin Function	CS	0.492595	0.258501	0.486728	0.0570568	1.28467
Griewank Function	CS	0.000375872	0.00023952	0.000365294	1.37805e-05	0.00113985
Ackley Function	ABC	0.00245008	0.00212516	0.00128364	8.31359e-06	0.00513331
Levy Function	CS	0.000123366	9.5453e-05	0.00011186	1.54827e-05	0.000365762
Schwefel Function	CS	-0.735767	-0.637281	0.390702	-1.38846	-0.275787
Sphere Function	BIOA	8.57748e-12	8.59476e-13	2.09578e-11	3.33296e-15	7.11048e-11
Rosenbrock Function	BIOA	8.9808e-05	9.21224e-06	0.000160087	1.04708e-06	0.000532602
Rastrigin Function	BIOA	2.78025e-07	5.37927e-08	4.61033e-07	5.51381e-12	1.471e-06
Griewank Function	BIOA	1.1939e-11	1.74194e-13	3.13396e-11	1.88738e-15	1.05779e-10
Ackley Function	PSO	0.026082	0.0119271	0.0262734	0.00283811	0.0725484
Levy Function	BIOA	2.46906e-11	4.93336e-14	7.26666e-11	1.01792e-14	2.42675e-10
Schwefel Function	BIOA	-1.77114e+14	-1.68693e+13	319479232948381	-1015312949828111	-8.50338e+07
Sphere Function	ACO	0.000198727	0.000118386	0.000215919	3.54136e-06	0.000672856
Rosenbrock Function	ACO	0.00218107	0.00084996	0.00255549	0.000563404	0.00797498
Rastrigin Function	ACO	0.0414001	0.034998	0.0315923	0.00497082	0.11171
Griewank Function	ACO	7.81341e-05	5.09369e-05	7.51511e-05	1.97933e-06	0.00026511
Ackley Function	ACO	0.0371567	0.0361904	0.0169366	0.00924771	0.0703655
Levy Function	ACO	5.12379e-05	3.77245e-05	5.50256e-05	3.23042e-06	0.000195476
Schwefel Function	ACO	0.00147971	0.00135702	0.000808758	0.000280238	0.00275361
Sphere Function	ABC	9.8081e-08	2.13654e-08	1.18911e-07	1.05734e-09	3.67305e-07
Rosenbrock Function	ABC	8.45395e-05	4.23397e-05	0.000108106	8.78134e-06	0.000389571
Rastrigin Function	ABC	0.00538809	0.00100365	0.00825776	0.000321919	0.0267047
Griewank Function	ABC	3.36344e-08	9.52034e-09	4.00084e-08	9.18141e-10	1.0937e-07
Ackley Function	CS	0.110669	0.100303	0.0383138	0.0641518	0.198766
Levy Function	ABC	1.29257e-08	5.11423e-09	1.28664e-08	1.95853e-09	3.92448e-08
Schwefel Function	ABC	-2.19211e+19	-3.33531e+18	5.18706e+19	-1.76549e+20	-2.89193e+17
sphere_function	SSSO	9.34583e-11	7.38093e-12	2.5686e-10	6.96938e-13	8.63689e-10
rosenbrock_function	SSSO	6.98463e-07	2.92553e-07	9.97534e-07	2.05273e-09	3.26111e-06
rastrigin_function	SSSO	5.37354	4.99636	3.06004	0.0867069	10.1738
griewank_function	SSSO	0.0142488	0.00908417	0.00801847	0.00740862	0.0273728
ackley_function	SSSO	0.491632	0.110707	1.04373	0.0079928	3.57679
levy_function	SSSO	1.15601e-10	2.67109e-12	3.0056e-10	7.33811e-15	1.01373e-09
schwefel_function	SSSO	-12.9779	-10.0669	5.5717	-21.0563	-7.8906
